# Supplementary material
Source: HighWire-hosted journal article supplement (https://www.life-science-alliance.org/content/2/5/e201900478/F5)
Supplement: inline-supplementary-material-3 [file inline-supplementary-material-3.pdf]

Cropped area

Fig 3C

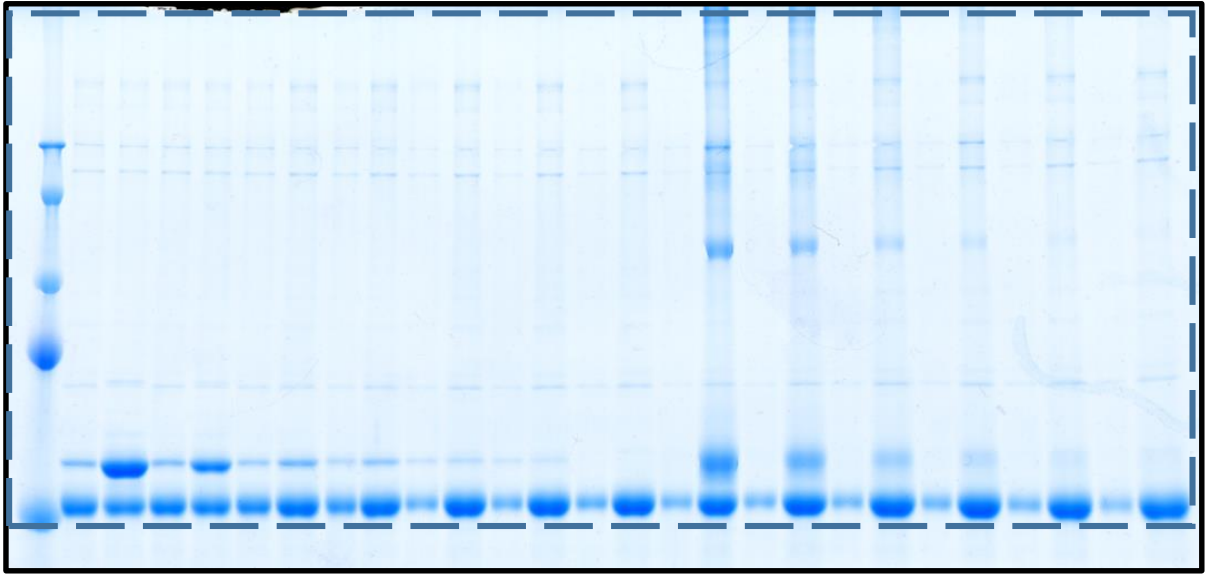

Figure 3 Toyoshima & Jiang et al.
